# Supplementary material for: A ferrocene-based chemo-dosimeter for colorimetric and electrochemical detection of cyanide and its estimation in cassava flour
Source: Royal Society of Chemistry journal article supplement (doi:10.1039/d4ay00415a), 2024-01-01
Supplement: d4ay00415a1.pdf [file d4ay00415a1.pdf]

# SUPPORTING INFORMATION

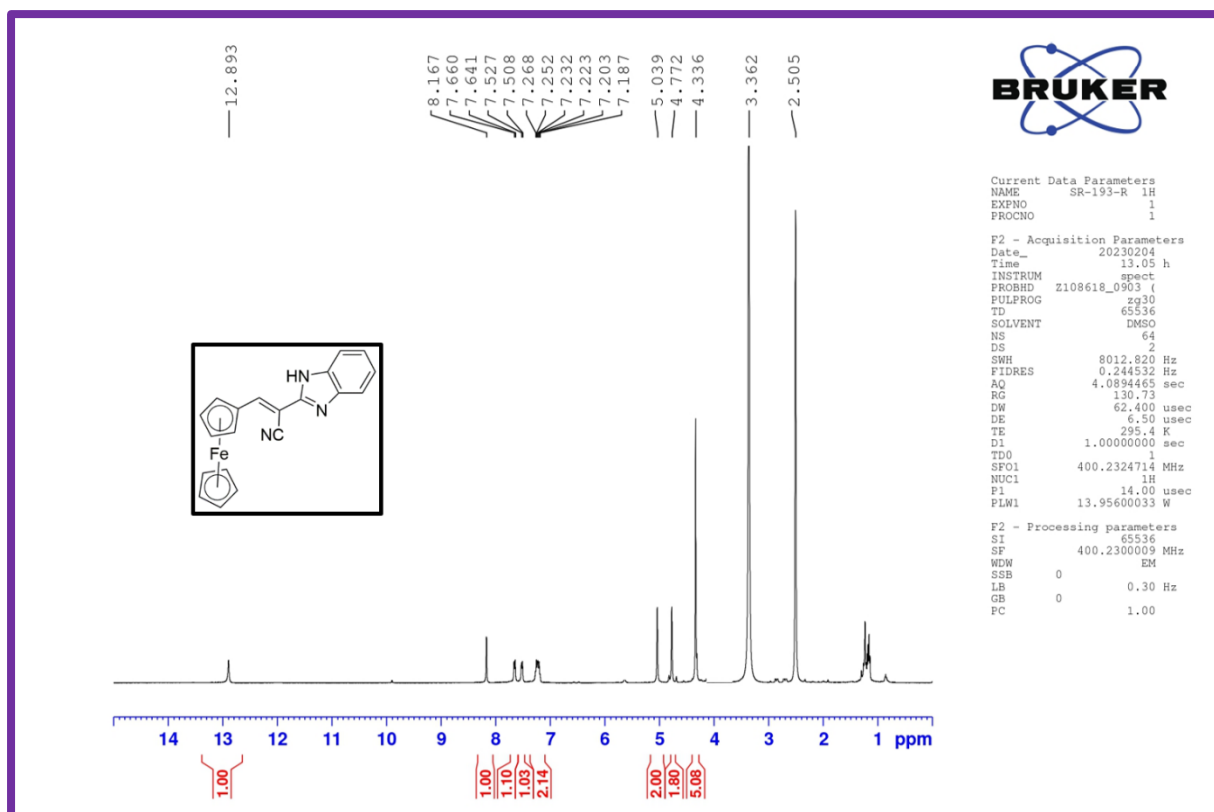

Fig. S1. <sup>1</sup>H NMR spectrum of VDP2

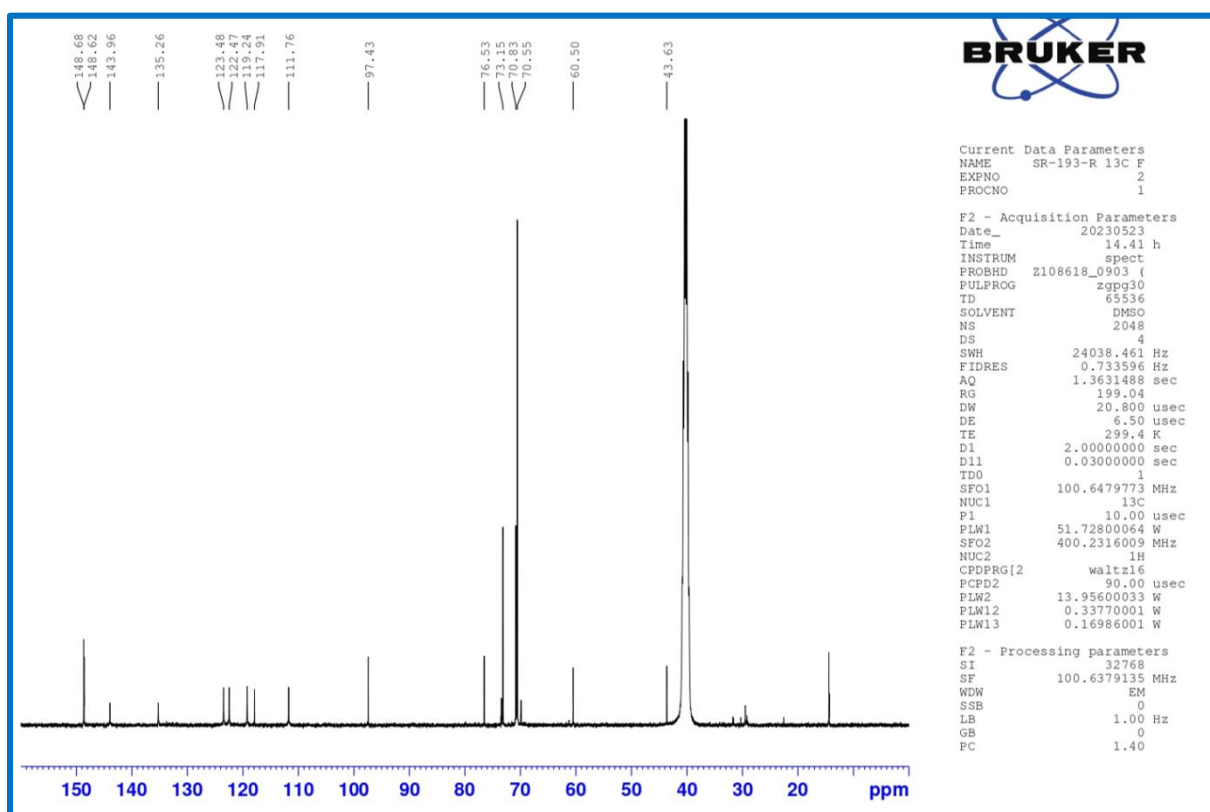

**Fig. S2.** <sup>13</sup>C NMR spectrum of VDP2

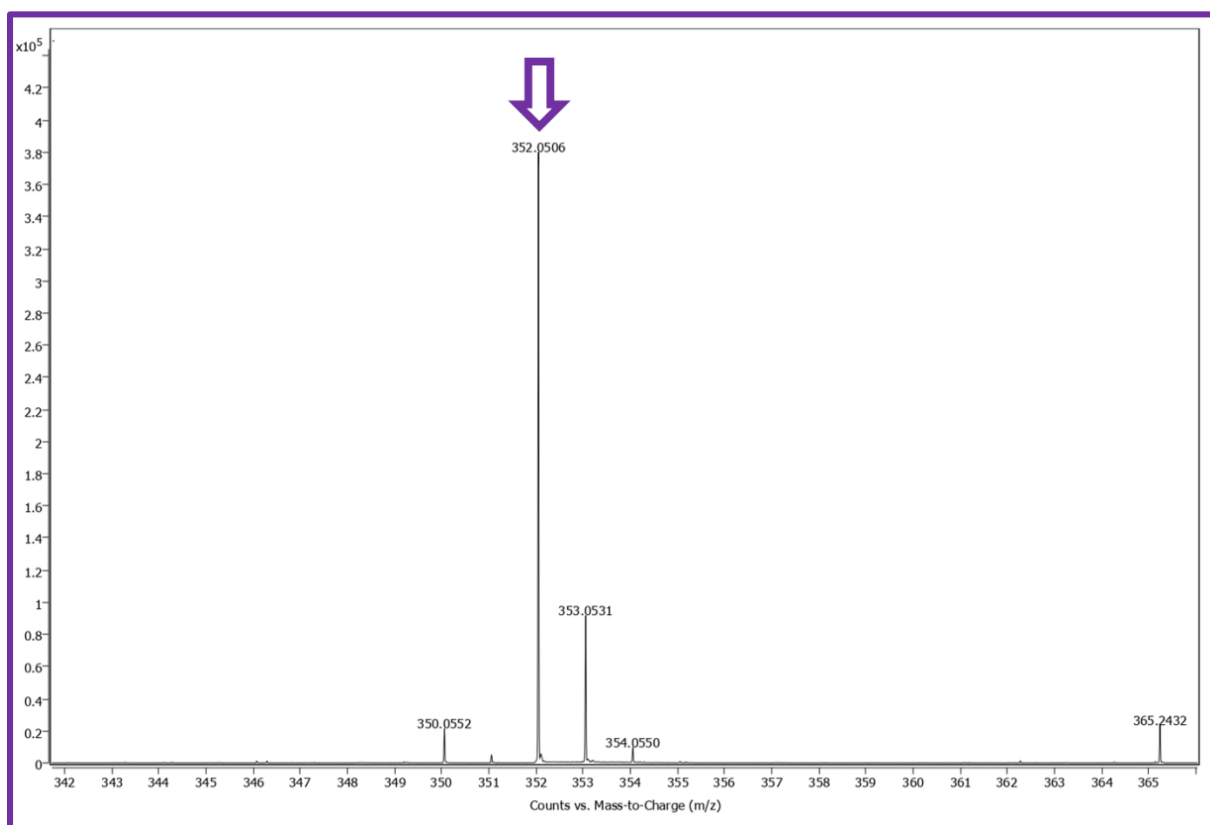

**Fig. S3.** HR-MS spectrum (negative mode) of **VDP2**

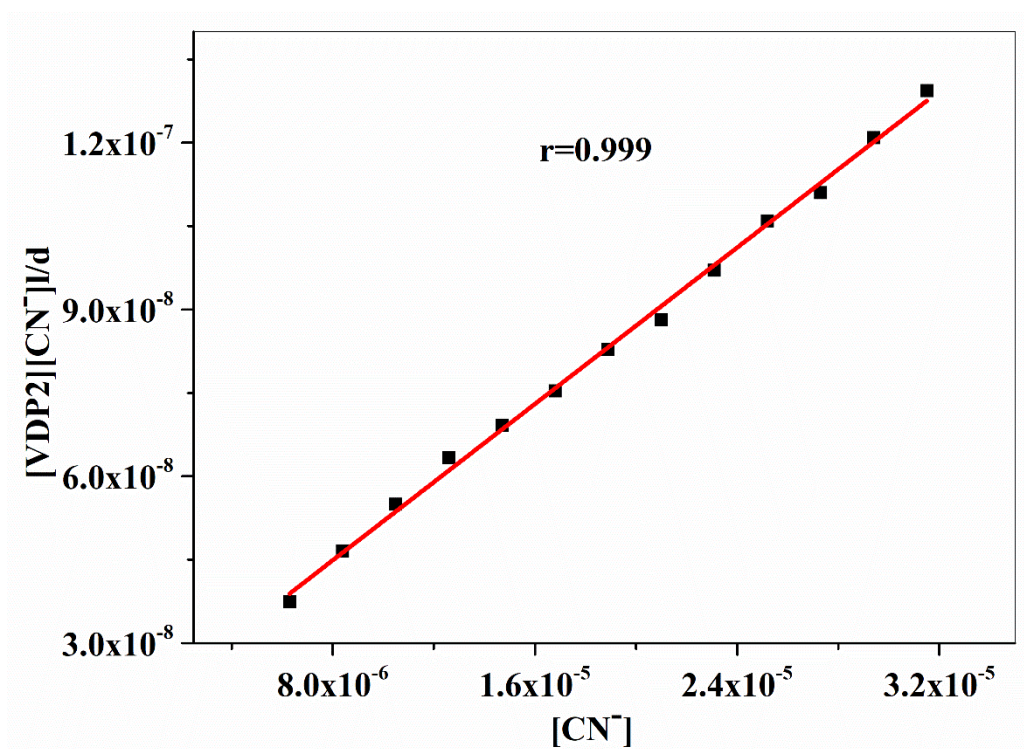

**Fig. S4.** Scott plot of **VDP2** with  $\text{CN}^-$  ion in  $\text{H}_2\text{O}$ -DMSO (9:1, v/v) medium

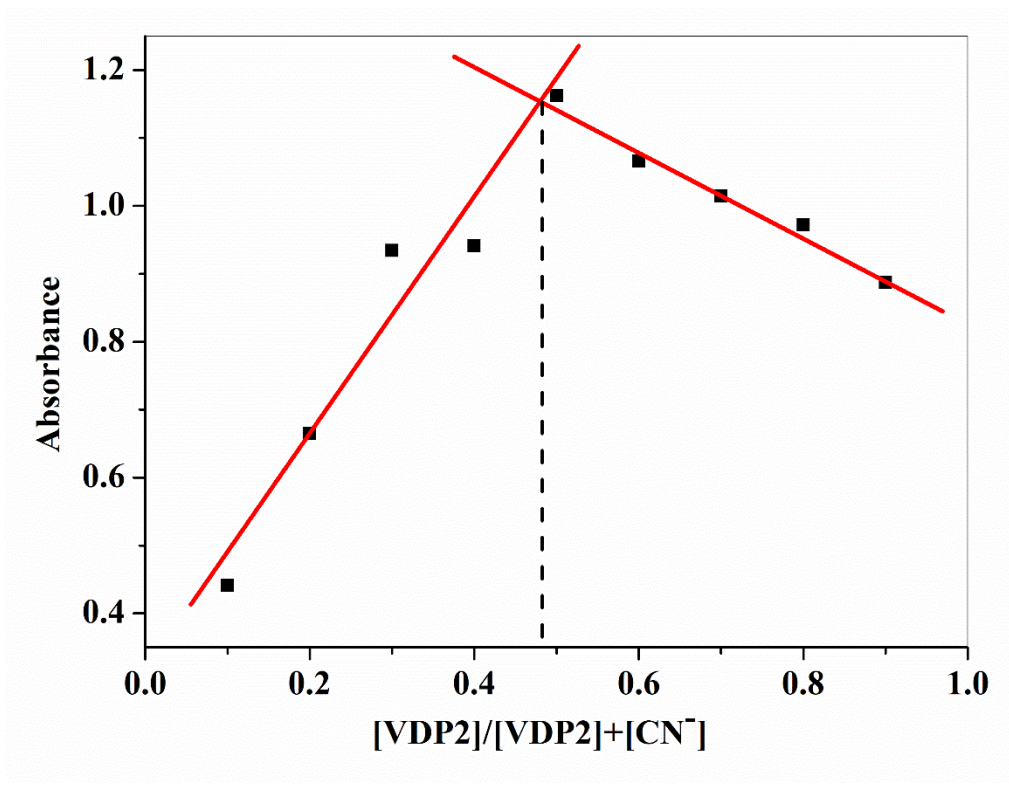

Fig. S5. Job's plot for **VDP2**+CN<sup>-</sup> complex in H<sub>2</sub>O-DMSO (9:1, v/v) medium

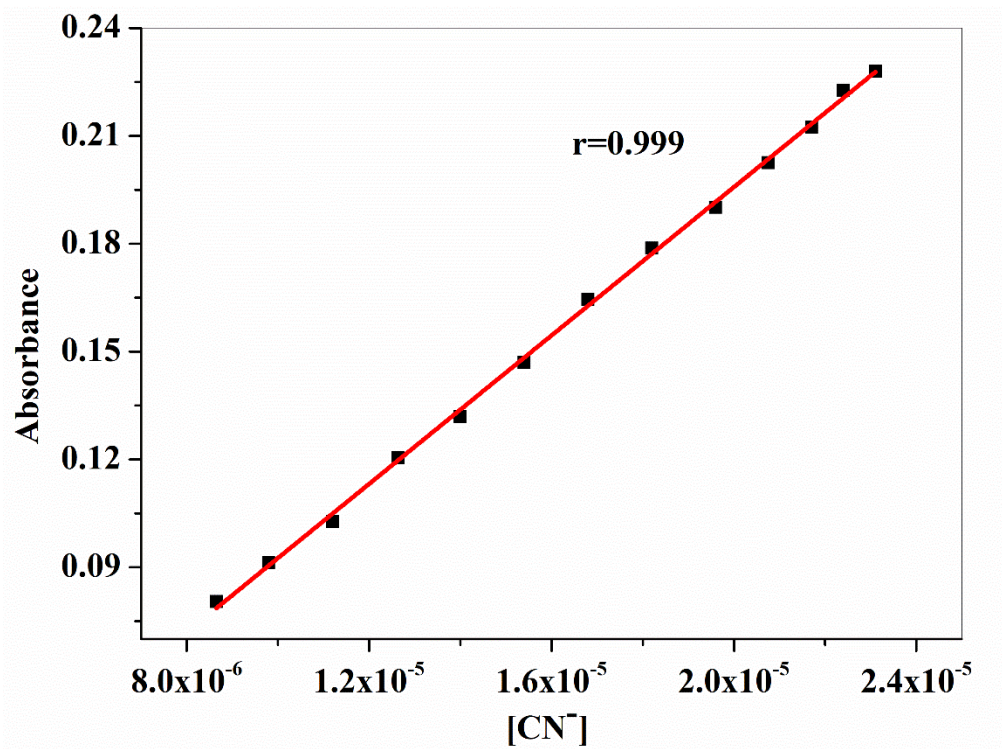

**Fig. S6.** Detection limit plot of **VDP2** with CN<sup>-</sup> ion in H<sub>2</sub>O-DMSO (9:1, v/v) medium

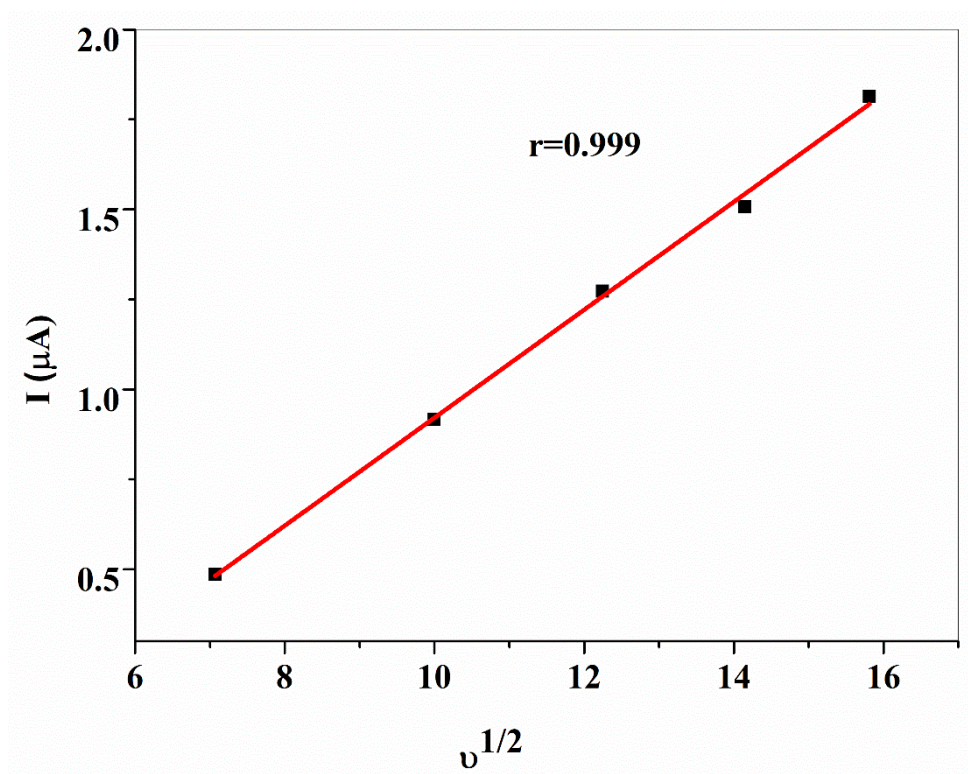

**Fig. S7.** The plot of  $I$  vs  $(v)^{1/2}$  of **VDP2** in  $\text{H}_2\text{O}$ -DMSO (9:1, v/v) medium



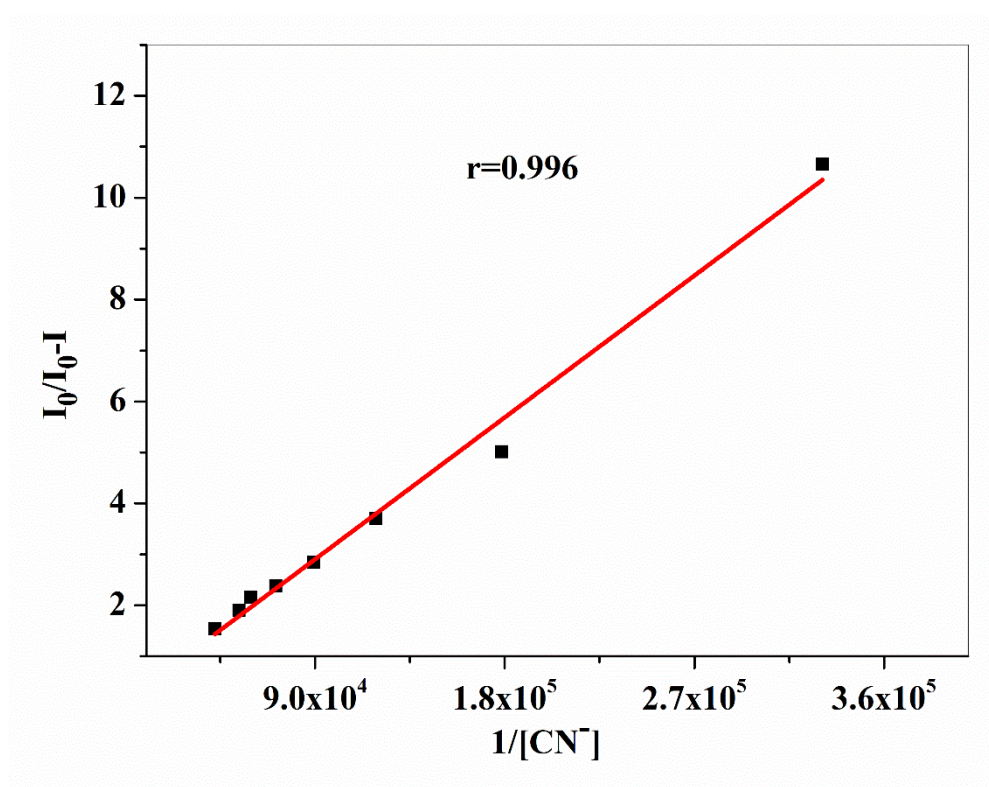

**Fig. S8.** The Electrochemical binding constant plot of  $I_0/I_0-I$  vs  $1/[CN^-]$  for the titration of **VDP2** with  $CN^-$  ions in  $H_2O$ -DMSO (9:1, v/v) medium



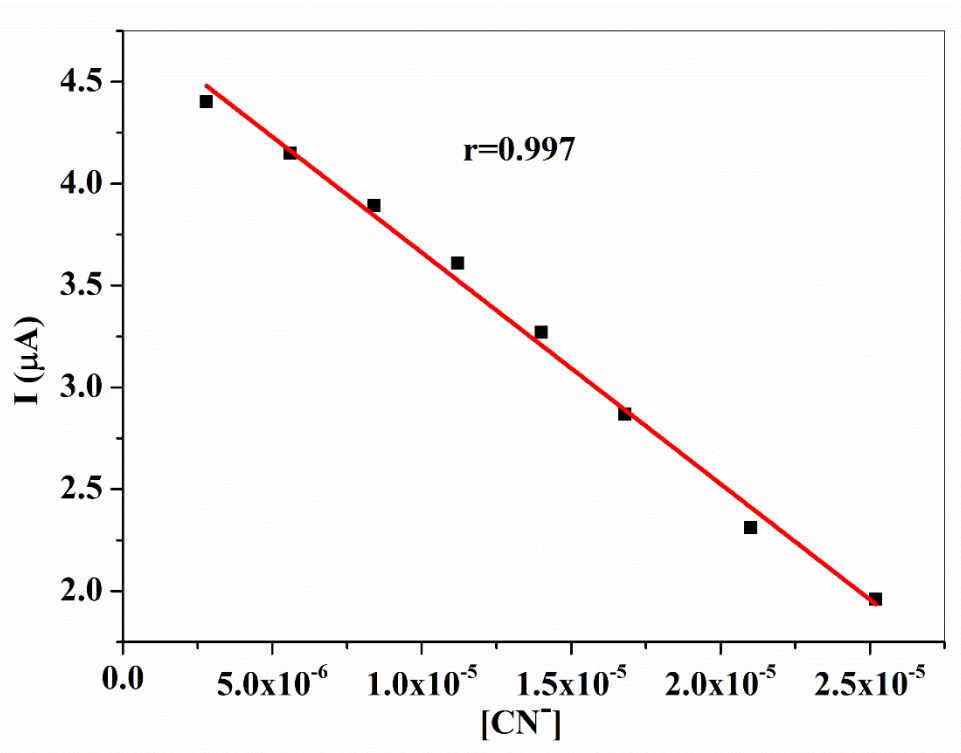

**Fig. S9.** The Electrochemical LOD plot of **VDP2** with CN<sup>-</sup> ions in H<sub>2</sub>O-DMSO (9:1, v/v) medium

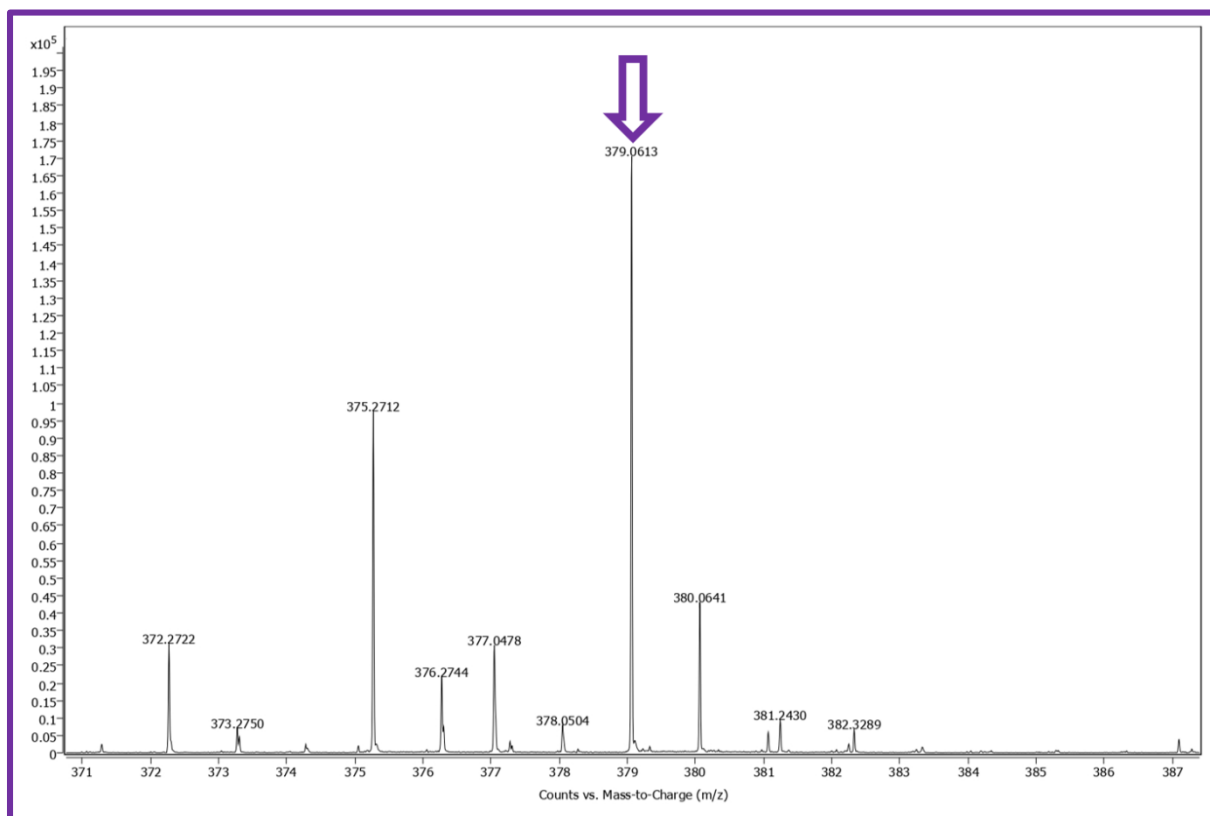

**Fig. S10.** HRMS spectra of VDP2 with  $\text{CN}^-$

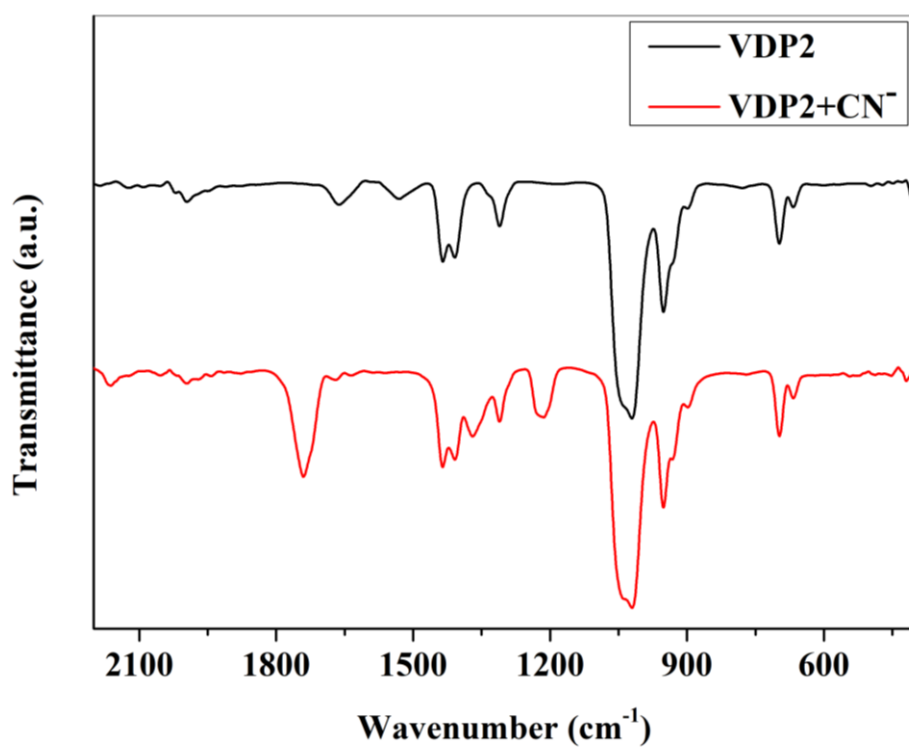

**Fig. S11.** Partial FT-IR spectra of **VDP2** and **VDP2+CN<sup>-</sup>** adduct

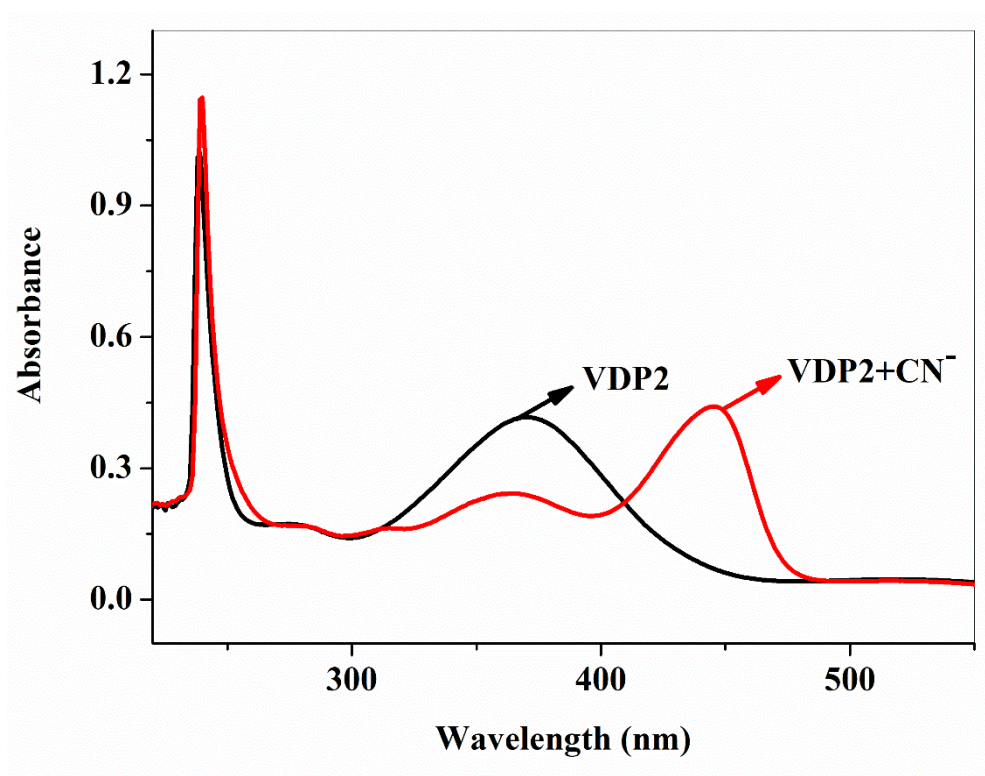

**Fig. S12.** UV-Visible spectra of VDP2 (25  $\mu\text{M}$ ) and VDP2 with  $\text{CN}^-$  (25  $\mu\text{M}$ ) in  $\text{H}_2\text{O}$ -DMSO (9:1, v/v) medium
